# Supplementary material for: Spatially coordinated airborne data and complementary products for aerosol, gas, cloud, and meteorological studies: the NASA ACTIVATE dataset
Source: Copernicus journal article supplement (doi:10.5194/essd-15-3419-2023), 2023-08-03
Supplement: Supplementary file 1 [file essd-15-3419-2023-supplement.pdf]

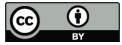

*Supplement of*

**Spatially coordinated airborne data and complementary products for aerosol, gas, cloud, and meteorological studies: the NASA ACTIVATE dataset**

**Armin Sorooshian et al.**

*Correspondence to:* Armin Sorooshian (armin@arizona.edu)

The copyright of individual parts of the supplement might differ from the article licence.

Table S1. Instrument performance summary for the King Air and HU-25 Falcon during ACTIVATE. OK = functioned well during the entire flight; “So So” = some loss of data quantity/quality; N/A = no usable data. Deployments are separated by blank rows: Deployment 1 (RF1-RF22), Deployment 2 (RF23-RF40), Deployment 3 (RF41-RF61), Deployment 4 (RF62-RF93), Deployment 5 (RF94-RF148), Deployment 6 (RF149-RF179).

| RF | Date      | King Air |        |     | Falcon |           |       |               |          |                    |               |     |       |      |                 |     |                 |
|----|-----------|----------|--------|-----|--------|-----------|-------|---------------|----------|--------------------|---------------|-----|-------|------|-----------------|-----|-----------------|
|    |           | AVAPS    | HSRL-2 | RSP | DLH    | Trace Gas | TAMMS | LARGE CDP/CAS | FCDP/2DS | LARGE Microphysics | LARGE Optical | CCN | AMS   | PILS | AC3 Cloud Water | CVI | State Variables |
| 1  | 2/14/2020 | OK       | OK     | OK  | OK     | So So     | OK    | So So         | OK       | OK                 | OK            | OK  | OK    | OK   | OK              | N/A | OK              |
| 2  | 2/15/2020 | OK       | OK     | OK  | OK     | So So     | OK    | So So         | OK       | OK                 | OK            | OK  | OK    | OK   | OK              | OK  | OK              |
| 3  | 2/17/2020 | OK       | OK     | OK  | OK     | So So     | OK    | So So         | OK       | OK                 | OK            | OK  | OK    | OK   | OK              | OK  | OK              |
| 4  | 2/21/2020 | N/A      | N/A    | N/A | OK     | So So     | OK    | So So         | OK       | OK                 | OK            | OK  | OK    | OK   | N/A             | OK  | OK              |
| 5  | 2/22/2020 | N/A      | N/A    | N/A | OK     | So So     | OK    | So So         | OK       | OK                 | OK            | OK  | OK    | OK   | OK              | OK  | OK              |
| 6  | 2/22/2020 | N/A      | N/A    | N/A | OK     | So So     | OK    | So So         | OK       | OK                 | OK            | OK  | OK    | OK   | OK              | OK  | OK              |
| 7  | 2/23/2020 | N/A      | N/A    | N/A | OK     | So So     | OK    | So So         | OK       | OK                 | OK            | OK  | OK    | OK   | N/A             | OK  | OK              |
| 8  | 2/23/2020 | N/A      | N/A    | N/A | OK     | So So     | OK    | So So         | OK       | OK                 | OK            | OK  | OK    | OK   | N/A             | OK  | OK              |
| 9  | 2/27/2020 | OK       | OK     | OK  | OK     | So So     | OK    | So So         | OK       | OK                 | OK            | OK  | OK    | OK   | OK              | OK  | OK              |
| 10 | 2/28/2020 | OK       | OK     | OK  | OK     | OK        | OK    | So So         | OK       | OK                 | OK            | OK  | OK    | OK   | OK              | OK  | OK              |
| 11 | 2/28/2020 | OK       | OK     | OK  | OK     | OK        | OK    | So So         | OK       | OK                 | OK            | OK  | OK    | OK   | OK              | OK  | OK              |
| 12 | 2/29/2020 | OK       | OK     | OK  | OK     | OK        | OK    | So So         | OK       | OK                 | OK            | OK  | OK    | OK   | OK              | OK  | OK              |
| 13 | 3/1/2020  | OK       | OK     | OK  | OK     | OK        | OK    | So So         | OK       | OK                 | OK            | OK  | OK    | OK   | OK              | OK  | OK              |
| 14 | 3/1/2020  | OK       | OK     | OK  | OK     | OK        | OK    | So So         | OK       | OK                 | OK            | OK  | OK    | OK   | OK              | OK  | OK              |
| 15 | 3/2/2020  | OK       | OK     | OK  | OK     | OK        | OK    | So So         | OK       | OK                 | OK            | OK  | OK    | OK   | OK              | OK  | OK              |
| 16 | 3/6/2020  | OK       | OK     | OK  | OK     | OK        | OK    | So So         | OK       | OK                 | OK            | OK  | OK    | OK   | OK              | OK  | OK              |
| 17 | 3/8/2020  | OK       | OK     | N/A | OK     | OK        | OK    | So So         | So So    | OK                 | OK            | OK  | OK    | OK   | OK              | OK  | OK              |
| 18 | 3/8/2020  | OK       | OK     | N/A | OK     | OK        | OK    | So So         | So So    | OK                 | OK            | OK  | OK    | OK   | OK              | OK  | OK              |
| 19 | 3/9/2020  | OK       | OK     | OK  | OK     | OK        | OK    | So So         | So So    | OK                 | OK            | OK  | OK    | OK   | OK              | OK  | OK              |
| 20 | 3/11/2020 | OK       | OK     | OK  | OK     | OK        | OK    | So So         | So So    | OK                 | OK            | OK  | So So | OK   | OK              | OK  | OK              |
| 21 | 3/12/2020 | OK       | OK     | OK  | OK     | OK        | OK    | So So         | So So    | OK                 | OK            | OK  | So So | OK   | OK              | OK  | OK              |
| 22 | 3/12/2020 | OK       | OK     | OK  | OK     | OK        | OK    | So So         | So So    | OK                 | OK            | OK  | So So | OK   | OK              | OK  | OK              |







|     |           |     |     |     |    |    |    |    |    |    |    |    |     |          |    |          |    |
|-----|-----------|-----|-----|-----|----|----|----|----|----|----|----|----|-----|----------|----|----------|----|
| 108 | 1/19/2022 | OK  | OK  | OK  | OK | OK | OK | OK | OK | OK | OK | OK | OK  | OK       | OK | OK       | OK |
| 109 | 1/24/2022 | OK  | OK  | OK  | OK | OK | OK | OK | OK | OK | OK | OK | OK  | OK       | OK | OK       | OK |
| 110 | 1/24/2022 | OK  | OK  | OK  | OK | OK | OK | OK | OK | OK | OK | OK | OK  | OK       | OK | OK       | OK |
| 111 | 1/26/2022 | OK  | OK  | OK  | OK | OK | OK | OK | OK | OK | OK | OK | OK  | OK       | OK | OK       | OK |
| 112 | 1/26/2022 | OK  | OK  | OK  | OK | OK | OK | OK | OK | OK | OK | OK | OK  | OK       | OK | OK       | OK |
| 113 | 1/27/2022 | OK  | OK  | OK  | OK | OK | OK | OK | OK | OK | OK | OK | OK  | OK       | OK | OK       | OK |
| 114 | 1/27/2022 | OK  | OK  | N/A | OK  | OK       | OK | OK       | OK |
| 115 | 2/1/2022  | OK  | OK  | OK  | OK | OK | OK | OK | OK | OK | OK | OK | OK  | OK       | OK | OK       | OK |
| 116 | 2/2/2022  | OK  | OK  | OK  | OK | OK | OK | OK | OK | OK | OK | OK | OK  | OK       | OK | OK       | OK |
| 117 | 2/3/2022  | OK  | OK  | OK  | OK | OK | OK | OK | OK | OK | OK | OK | OK  | OK       | OK | OK       | OK |
| 118 | 2/3/2022  | OK  | OK  | OK  | OK | OK | OK | OK | OK | OK | OK | OK | N/A | OK       | OK | So<br>So | OK |
| 119 | 2/5/2022  | OK  | OK  | OK  | OK | OK | OK | OK | OK | OK | OK | OK | OK  | OK       | OK | OK       | OK |
| 120 | 2/15/2022 | OK  | OK  | OK  | OK | OK | OK | OK | OK | OK | OK | OK | OK  | OK       | OK | OK       | OK |
| 121 | 2/15/2022 | OK  | OK  | OK  | OK | OK | OK | OK | OK | OK | OK | OK | OK  | OK       | OK | OK       | OK |
| 122 | 2/16/2022 | OK  | OK  | OK  | OK | OK | OK | OK | OK | OK | OK | OK | OK  | OK       | OK | OK       | OK |
| 123 | 2/16/2022 | OK  | OK  | OK  | OK | OK | OK | OK | OK | OK | OK | OK | OK  | OK       | OK | OK       | OK |
| 124 | 2/19/2022 | OK  | OK  | OK  | OK | OK | OK | OK | OK | OK | OK | OK | OK  | OK       | OK | OK       | OK |
| 125 | 2/19/2022 | OK  | OK  | OK  | OK | OK | OK | OK | OK | OK | OK | OK | OK  | OK       | OK | OK       | OK |
| 126 | 2/22/2022 | OK  | OK  | OK  | OK | OK | OK | OK | OK | OK | OK | OK | OK  | OK       | OK | OK       | OK |
| 127 | 2/22/2022 | OK  | OK  | OK  | OK | OK | OK | OK | OK | OK | OK | OK | OK  | OK       | OK | OK       | OK |
| 128 | 2/26/2022 | OK  | OK  | OK  | OK | OK | OK | OK | OK | OK | OK | OK | OK  | OK       | OK | OK       | OK |
| 129 | 2/26/2022 | N/A | N/A | OK  | OK | OK | OK | OK | OK | OK | OK | OK | OK  | OK       | OK | OK       | OK |
| 130 | 3/2/2022  | OK  | OK  | OK  | OK | OK | OK | OK | OK | OK | OK | OK | OK  | OK       | OK | OK       | OK |
| 131 | 3/3/2022  | OK  | OK  | OK  | OK | OK | OK | OK | OK | OK | OK | OK | OK  | OK       | OK | OK       | OK |
| 132 | 3/3/2022  | OK  | OK  | OK  | OK | OK | OK | OK | OK | OK | OK | OK | OK  | OK       | OK | OK       | OK |
| 133 | 3/4/2022  | OK  | OK  | OK  | OK | OK | OK | OK | OK | OK | OK | OK | OK  | OK       | OK | OK       | OK |
| 134 | 3/4/2022  | OK  | OK  | OK  | OK | OK | OK | OK | OK | OK | OK | OK | OK  | OK       | OK | OK       | OK |
| 135 | 3/7/2022  | OK  | OK  | OK  | OK | OK | OK | OK | OK | OK | OK | OK | OK  | So<br>So | OK | OK       | OK |
| 136 | 3/7/2022  | N/A | N/A | N/A | OK  | So<br>So | OK | OK       | OK |







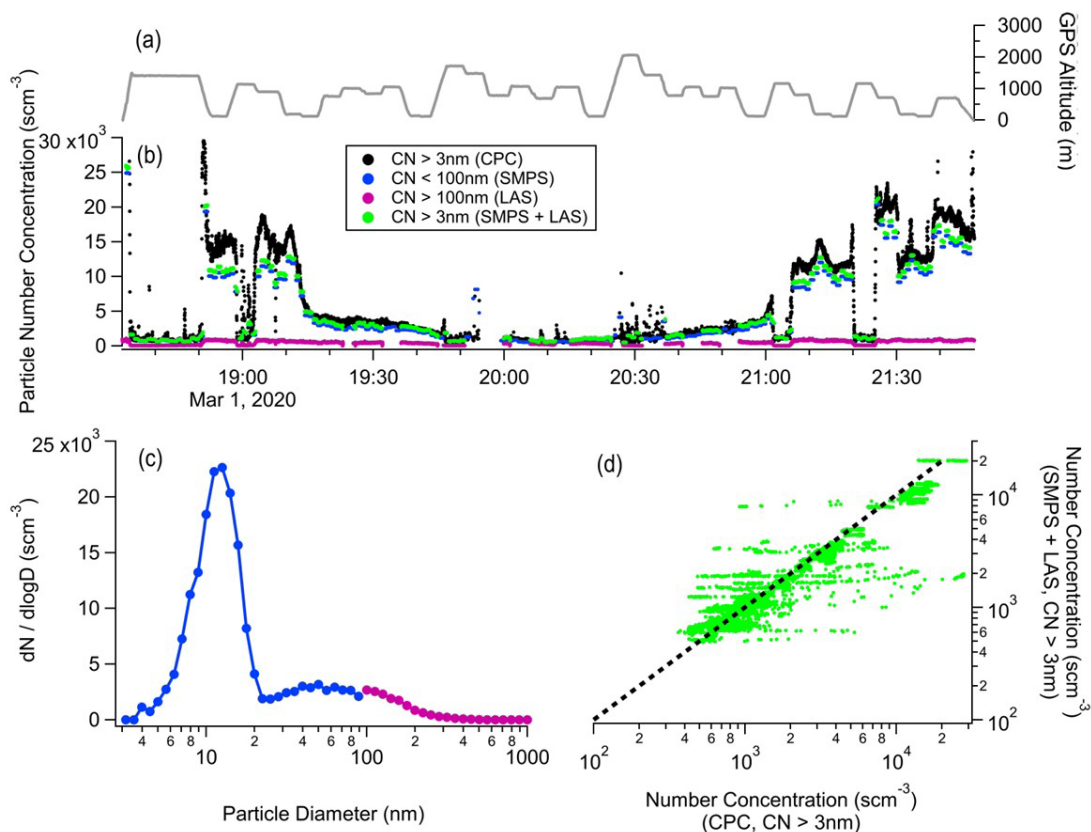

13

Figure S1: Closure analysis for particle number concentration measurements derived from an ultrafine CPC, SMPS, and LAS. (a-b) Time series data are shown for Research Flight 14 (1 March 2020), (c) an average size distribution during a MinAlt leg at approximately UTC 21:17, and (d) a scatterplot of the integrated number concentration derived from LAS+SMPS instruments against number concentration directly measured by a CPC. For panel d, orthogonal distance regression (ODR) linear fitting resulted in a slope of 0.722, intercept of  $433 \text{ cm}^{-3}$ , and coefficient of determination ( $r^2$ ) of 0.861. Mean absolute error (MAE) and mean absolute percentage error (MAPE) values are  $1219 \text{ cm}^{-3}$  and 24.9%, respectively.
